# Supplementary material
Source: PubMed Central journal article supplement (PMC10334736)
Supplement: zsad131_suppl_supplementary_material.pdf [file zsad131_suppl_supplementary_material.pdf]

## **Manuscript Title**

Adolescent sleep defects and dopaminergic hyperactivity in mice with a schizophrenia-linked Shank3 mutation.

## **Authors**

Wen-Jie Bian<sup>1,2\*</sup>, Oscar C. González<sup>1,2</sup>, Luis de Lecea<sup>1,2\*</sup>

## **Author Affiliations**

<sup>1</sup>Department of Psychiatry and Behavioral Sciences, Stanford University School of Medicine, Stanford, CA, 94305, USA

<sup>2</sup>Wu Tsai Neurosciences Institute, Stanford University, Stanford, CA 94305, USA

\*Corresponding authors: Wen-Jie Bian, Department of Psychiatry and Behavioral Sciences, Stanford University School of Medicine, 1201 Welch Road MSLS P154, Stanford, CA 94305, USA, Email: [wjbian@stanford.edu](mailto:wjbian@stanford.edu);  
Luis de Lecea, Department of Psychiatry and Behavioral Sciences, Stanford University School of Medicine, 1201 Welch Road MSLS P107, Stanford, CA 94305, USA, Email: [llecea@stanford.edu](mailto:llecea@stanford.edu).

**Supplemental Material List**

**Supplementary Figures 1 – 5.**

**Supplementary Figure Legends.**

**Supplementary Table 1.**

**Supplementary Table 2**

## Supplementary Figure Legends

### Supplementary Figure 1. Adolescent sleep architecture in male and female *R1117X* mice.

Sleep architecture parameters quantified from adolescent *R1117X*<sup>+/+</sup> mice and WT littermates. Male, n = 5 in WT; 6 in *R1117X*<sup>+/+</sup>; female, n = 5 each. (A, F) Total amount of time in Wake, NREM and REM states over 24 h. Welch's t-test between genotypes, (A) Wake,  $t = 3.14$ ,  $df = 7.06$ ,  $P = 0.02$ ; NREM,  $t = 2.80$ ,  $df = 5.57$ ,  $P = 0.03$ , (F) Wake,  $t = 2.81$ ,  $df = 7.91$ ,  $P = 0.02$ ; NREM,  $t = 2.64$ ,  $df = 7.61$ ,  $P = 0.03$ , REM,  $t = 3.11$ ,  $df = 6.08$ ,  $P = 0.02$ . (B, G) Average length of Wake, NREM and REM bouts over 24 h. Welch's t-test between genotypes, (B) Wake,  $t = 3.20$ ,  $df = 8.91$ ,  $P = 0.01$ , (G) NREM,  $t = 4.56$ ,  $df = 7.45$ ,  $P = 0.002$ . (C-J) Bout number of each state during light/dark phase and the 24 h cycle. Welch's t-test between genotypes, (D) Wake,  $t = 2.58$ ,  $df = 8.78$ ,  $P = 0.03$ ; NREM,  $t = 2.72$ ,  $df = 8.86$ ,  $P = 0.02$ , (E) Wake,  $t = 2.91$ ,  $df = 6.75$ ,  $P = 0.02$ ; NREM,  $t = 2.96$ ,  $df = 6.44$ ,  $P = 0.02$ , (I) REM,  $t = 2.89$ ,  $df = 4.49$ ,  $P = 0.04$ . (K) Representative movement trajectories of WT and *R1117X*<sup>+/+</sup> mice in their respective home-cages during 20 min in the dark phase. (L, M) Total distance traveled (L) and moving speed (M) of WT and *R1117X*<sup>+/+</sup> mice. n = 5 each. Welch's t-test,  $P > 0.05$ . Data are shown as mean  $\pm$  s.e.m. All tests were two-sided. \*  $P < 0.05$ ; \*\*  $P < 0.01$ ; \*\*\*  $P < 0.001$ ; n.s., not significant,  $P > 0.05$ .

### Supplementary Figure 2. Adult sleep architecture in *R1117X* mice.

(A-C) Hourly percentage of Wake (A), NREM (B) and REM (C) sleep in adult *R1117X*<sup>+/+</sup> and WT mice (male and female combined, P70 – 90) over a 24-h light-dark cycle (n = 5 in WT; 4 in *R1117X*<sup>+/+</sup>). RM two-way ANOVA followed by Bonferroni's post-tests between genotypes, statistical significance as indicated on the graph. (D-L) Total time (D, G, J), average bout length (E, H, K) and bout number (F, I, L) of adult *R1117X*<sup>+/+</sup> and WT mice (n = 5 each). Welch's t-test between genotypes, (D) REM,  $t = 2.49$ ,  $df = 7.32$ , \*  $P = 0.04$ , (E) NREM,  $t = 2.51$ ,  $df = 7.98$ , \*  $P = 0.04$ , (G) Wake,  $t = 3.81$ ,  $df = 6.46$ , \*\*  $P = 0.008$ ; NREM,  $t = 3.51$ ,  $df = 6.50$ , \*  $P = 0.01$ ; REM,  $t = 5.04$ ,  $df = 7.21$ , \*\*  $P = 0.001$ , (H) NREM,  $t = 4.81$ ,  $df = 7.17$ , \*\*  $P = 0.002$ , (J) Wake,  $t = 5.51$ ,  $df = 8.00$ , \*\*\*  $P = 0.0006$ ; NREM,  $t = 5.35$ ,  $df = 7.97$ , \*\*\*  $P = 0.0007$ ; REM,  $t = 4.77$ ,  $df = 7.96$ , \*\*  $P = 0.001$ , (K) NREM,  $t = 4.13$ ,  $df = 7.99$ , \*\*  $P = 0.003$ , (L) REM,  $t = 2.52$ ,  $df = 8.00$ , \*  $P = 0.04$ . (M-R) EEG

power spectrum of each state (M-O, shaded area indicates s.e.m.) and quantification of each frequency band (P-R). n = 5 each. Welch's t-test between genotypes, (Q) Delta,  $t = 9.97$ ,  $df = 7.13$ ,  $P = 0.00002$ ; Alpha,  $t = 12.36$ ,  $df = 6.95$ ,  $P = 0.000006$ ; Beta,  $t = 5.33$ ,  $df = 7.98$ ,  $P = 0.00007$ ; Spindle range,  $t = 8.43$ ,  $df = 5.92$ ,  $P = 0.0002$ , (R) Theta,  $t = 4.58$ ,  $df = 6.81$ ,  $P = 0.003$ ; Alpha,  $t = 4.25$ ,  $df = 5.69$ ,  $P = 0.006$ . Data are shown as mean  $\pm$  s.e.m. All tests were two-sided. \*  $P < 0.05$ ; \*\*  $P < 0.01$ ; \*\*\*  $P < 0.001$ ; n.s., not significant,  $P > 0.05$ .

### **Supplementary Figure 3. Adolescent sleep architecture in male *Nlgn3 R451C* mice.**

(A-C) Hourly percentage of Wake (A), NREM (B) and REM (C) sleep in male *R451C/y* mice and WT littermates over a 24-h light-dark cycle during P37 – 40 (n = 6 each). RM two-way ANOVA followed by Bonferroni's post-tests. (D-L) Total time (D, G, J), average bout length (E, H, K) and bout number (F, I, L) of male *R451C/y* and WT mice (n = 6 each). Welch's t-test between genotypes, (F) REM,  $t = 2.34$ ,  $df = 9.90$ ,  $P = 0.04$ , (K) REM,  $t = 2.40$ ,  $df = 6.83$ ,  $P = 0.048$ , (L) REM,  $t = 2.48$ ,  $df = 9.97$ ,  $P = 0.03$ . (M-R) EEG power spectrum of each state (M-O, shaded area indicates s.e.m.) and quantification of each frequency band (P-R). n = 6 each. Welch's t-test between genotypes, (R) Alpha,  $t = 2.76$ ,  $df = 8.72$ ,  $P = 0.02$ . Data are shown as mean  $\pm$  s.e.m. All tests were two-sided. \*  $P < 0.05$ ; \*\*  $P < 0.01$ ; \*\*\*  $P < 0.001$ ; n.s., not significant,  $P > 0.05$ .

### **Supplementary Figure 4. Adolescent sleep architecture in male *16p11.2* deletion mice.**

(A-C) Hourly percentage of Wake (A), NREM (B) and REM (C) sleep in male *16p11.2del/+* mice and WT littermates over a 24-h light-dark cycle during P37 – 40 (n = 6 in WT; 7 in *del/+*). RM two-way ANOVA followed by Bonferroni's post-tests. (D-L) Total time (D, G, J), average bout length (E, H, K) and bout number (F, I, L) of male *R451C/y* and WT mice (n = 6 in WT; 7 in *del/+*). Welch's t-test between genotypes, all n.s. (M-R) EEG power spectrum of each state (M-O, shaded area indicates s.e.m.) and quantification of each frequency band (P-R). n = 6 in WT; 7 in *del/+*. Welch's t-test between genotypes, (P) Low Delta,  $t = 2.78$ ,  $df = 10.74$ ,  $P = 0.02$ . Data are shown as mean  $\pm$  s.e.m. All tests were two-sided. \*  $P < 0.05$ ; \*\*  $P < 0.01$ ; \*\*\*  $P < 0.001$ ; n.s., not significant,  $P > 0.05$ .

**Supplementary Figure 5. EEG power in multiple frequency bands during adolescent NREM sleep correlates with adult sociability.**

(A) Linear regression between  $PI_{Sociability}$  in adult three-chamber test and relative EEG power in each frequency band during adolescent NREM sleep ( $n = 18$ ). (B) Linear correlations of adolescent NREM EEG power in the spindle range (10 – 15 Hz) with adult  $PI_{Sociability}$  or  $PI_{SN}$  ( $n = 18$ ).

# Supplementary Figure 1

## Male

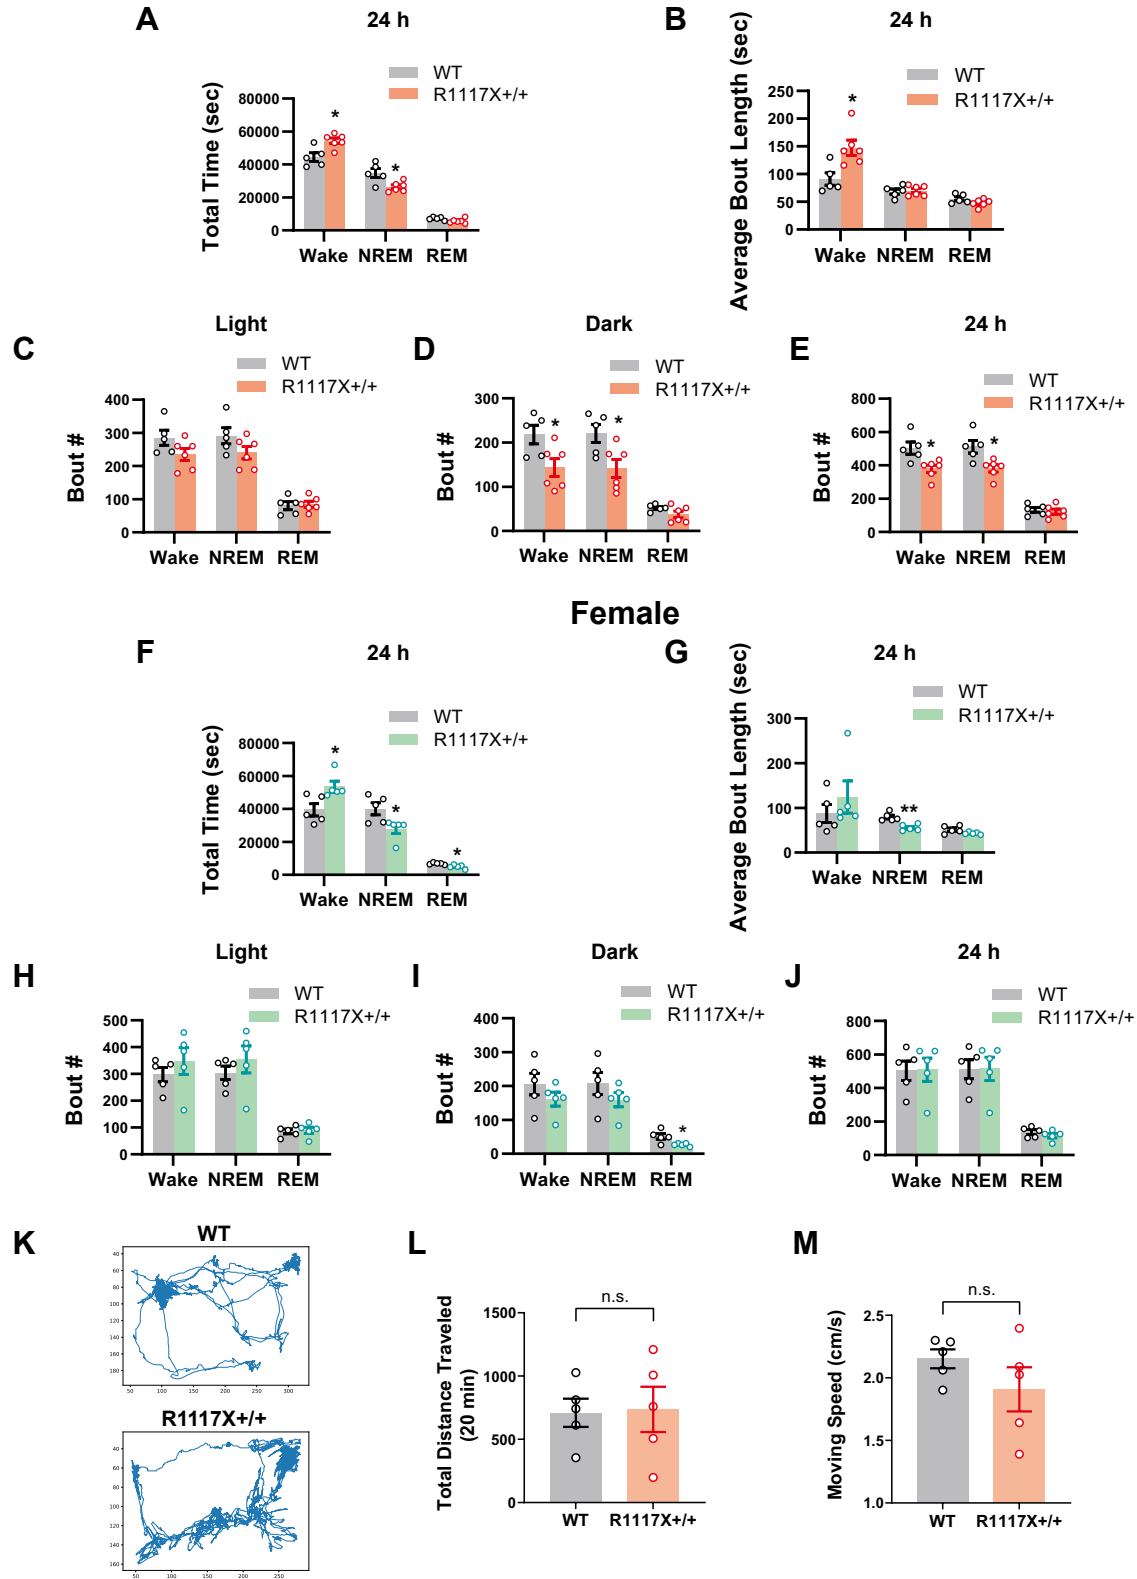

# Supplementary Figure 2

## Adult R1117X (P70 - 90)

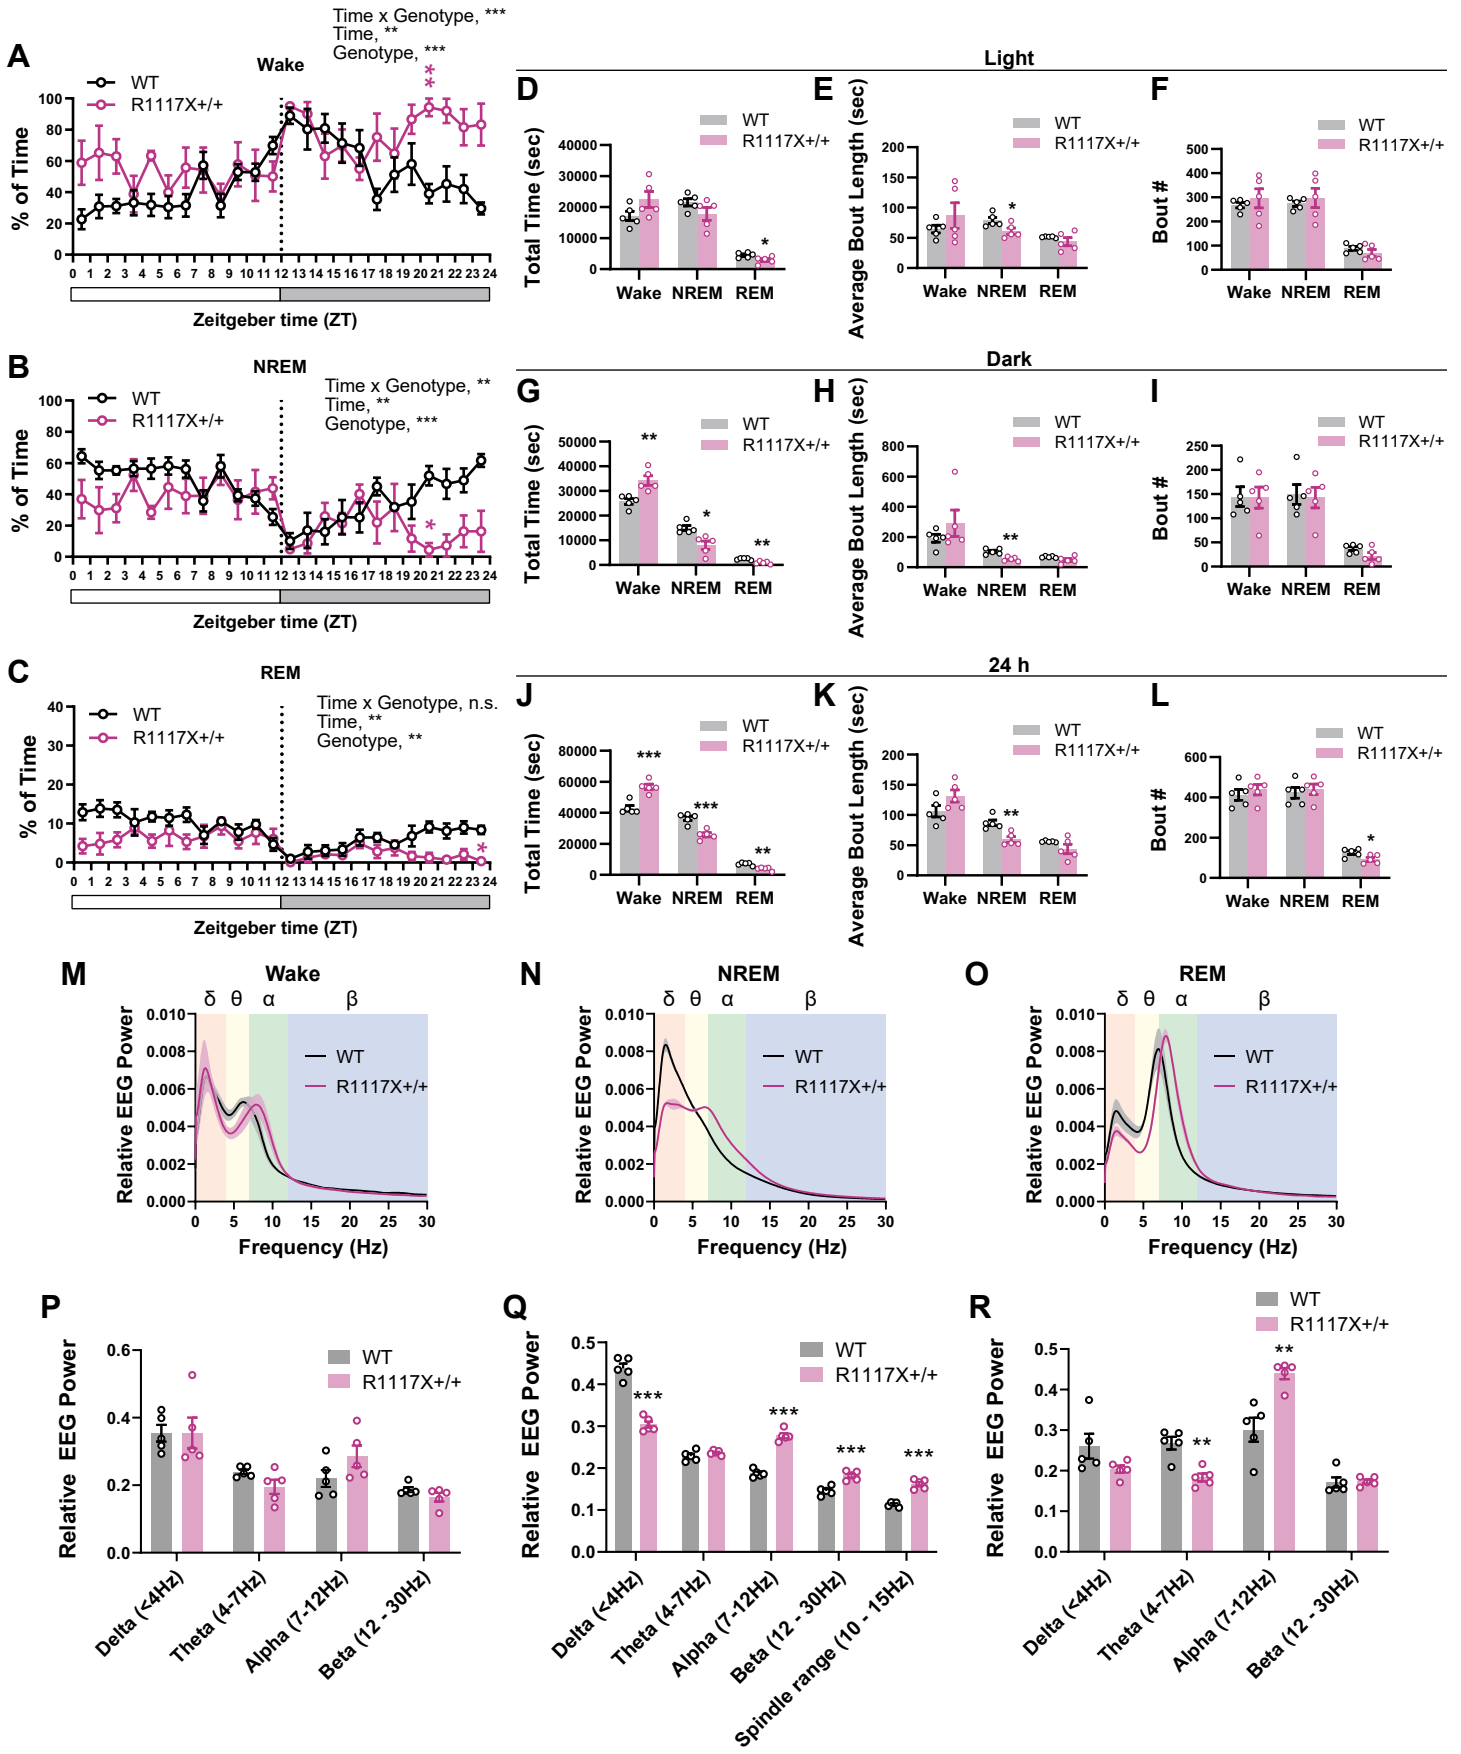

# Supplementary Figure 3

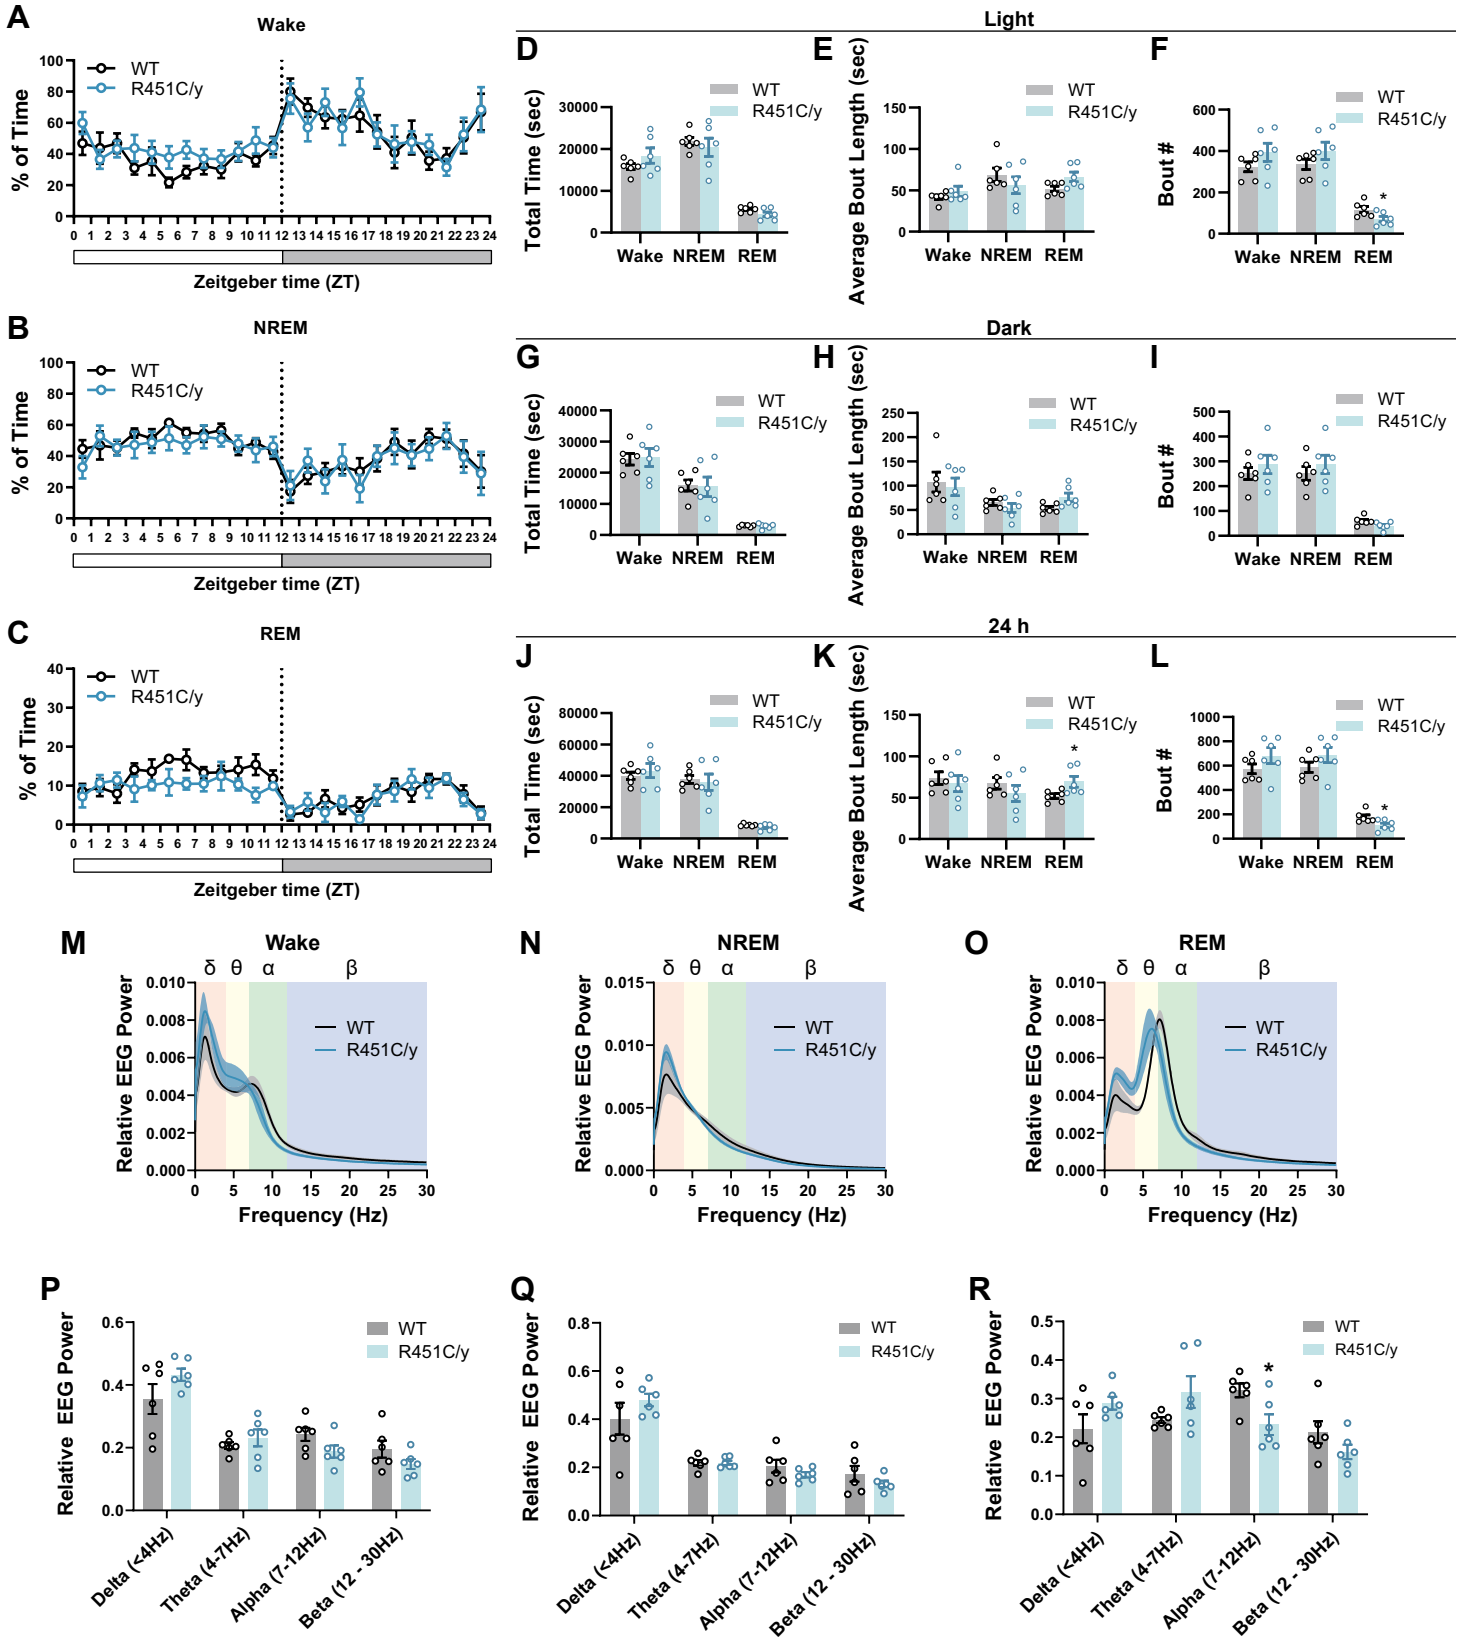



# Supplementary Figure 4

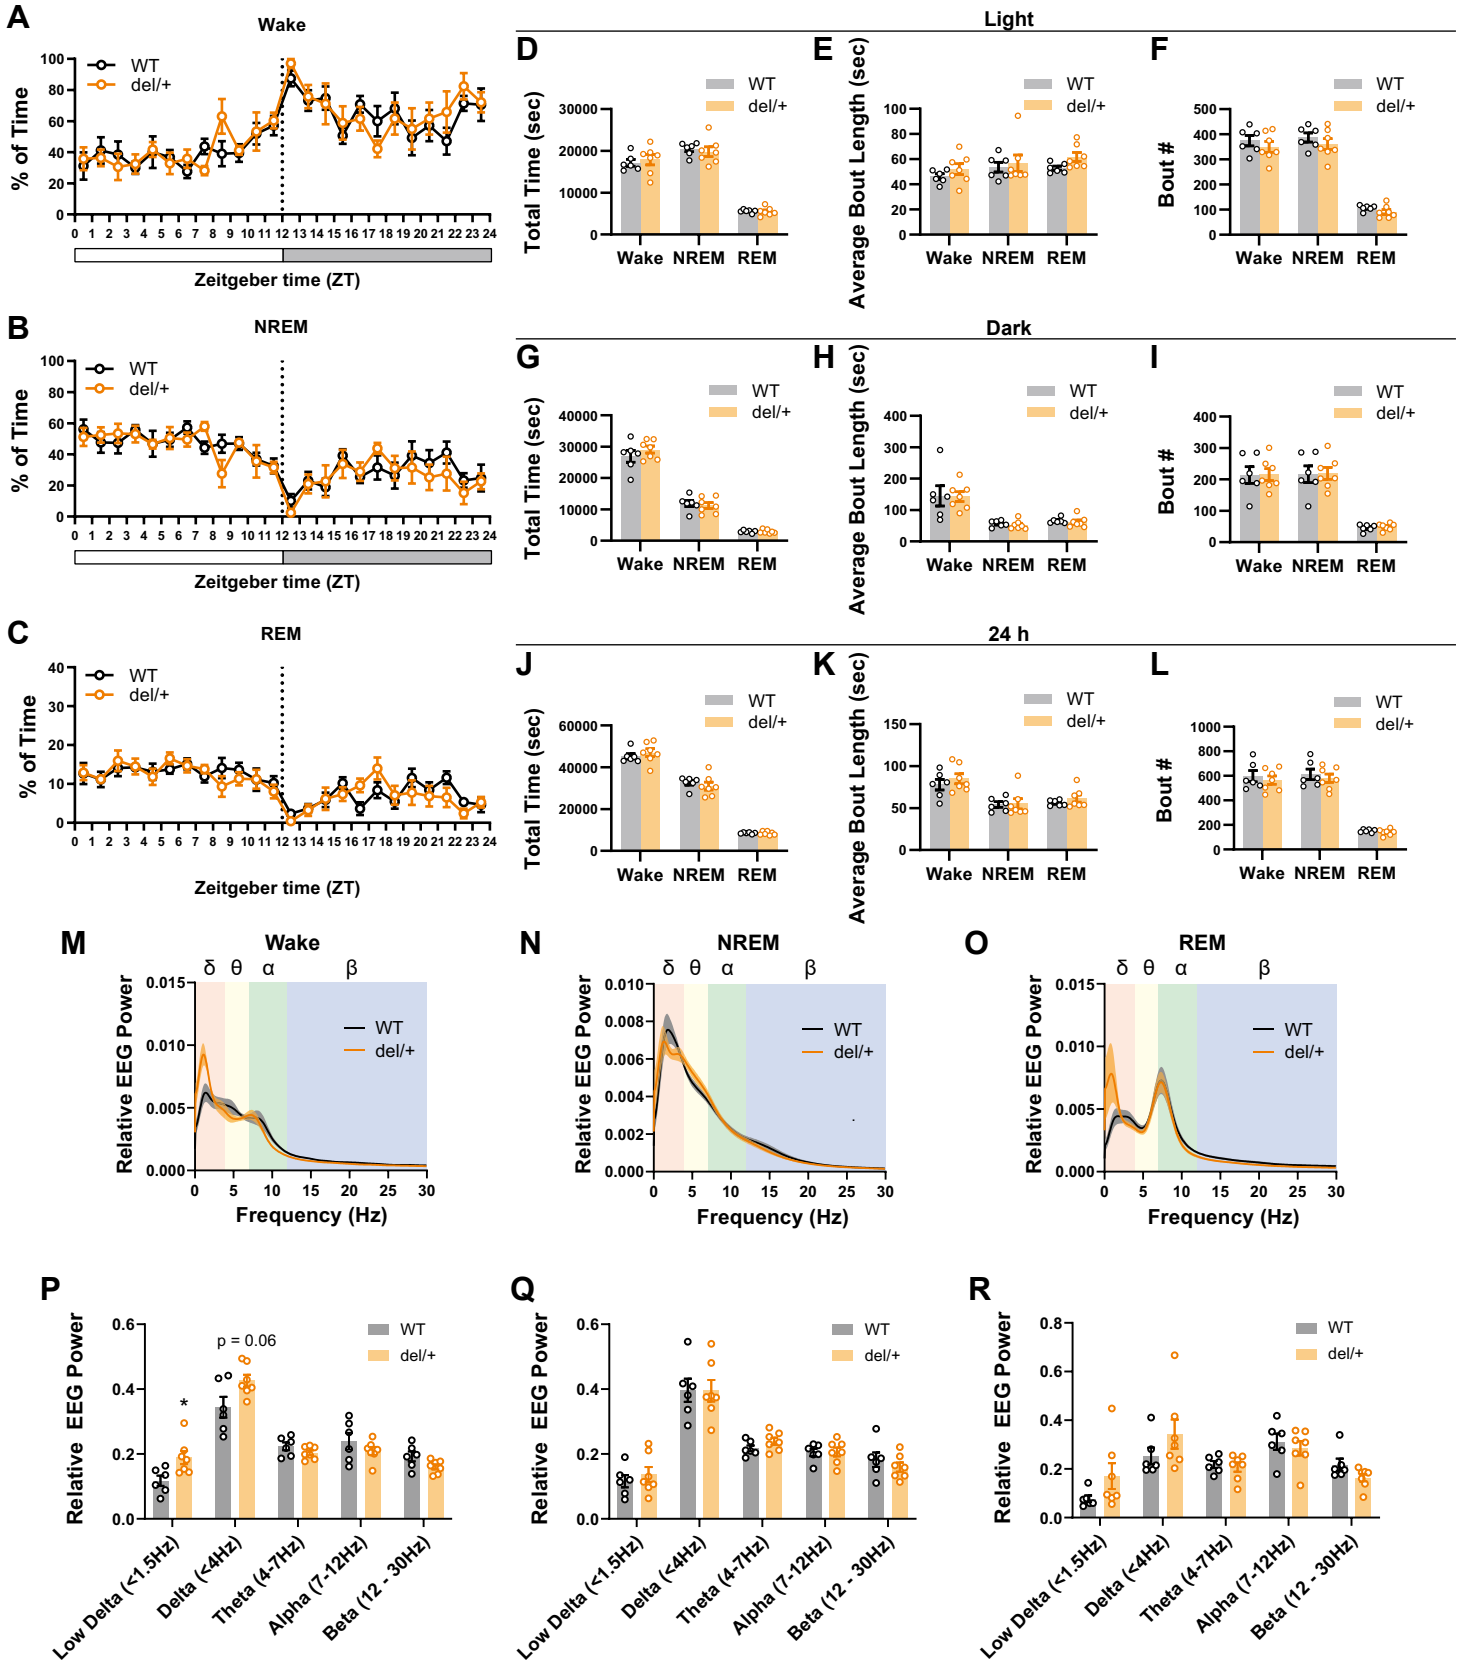

# Supplementary Figure 5

A

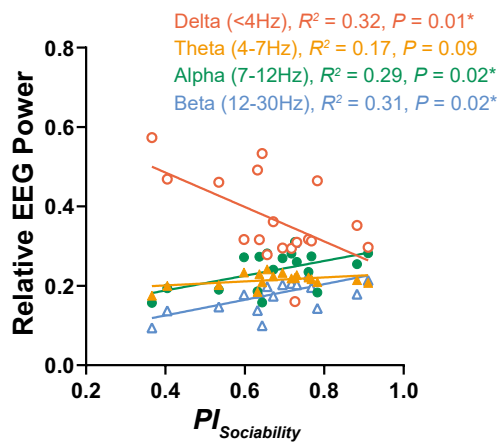

B

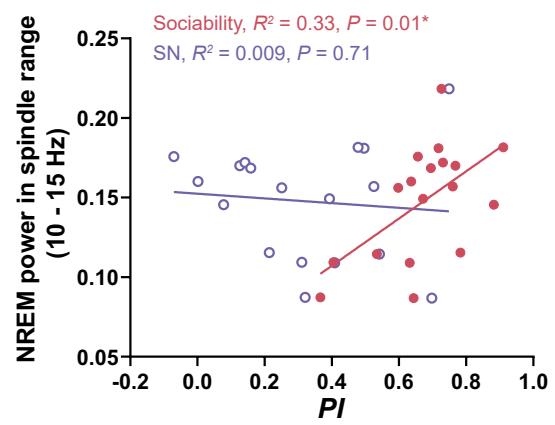

**Supplementary Table 1. Summary of linear regressions between adult social preferences and adolescent sleep parameters**

| <b>Sociability (X)</b>                |              |                      |             |          |
|---------------------------------------|--------------|----------------------|-------------|----------|
| <b>Inverse correlated</b>             |              |                      |             |          |
| <b>Sleep parameters (Y)</b>           | <b>Slope</b> | <b>R<sup>2</sup></b> | <b>R</b>    | <b>P</b> |
| NREM EEG Power - Delta                | -0.4336      | 0.3218               | 0.567274184 | 0.0141*  |
| Total amount in 24h (s) - NREM        | -28512       | 0.2296               | 0.479165942 | 0.0442*  |
| Average Bout Length in 24h (s) - NREM | -38.45       | 0.1917               | 0.437835586 | 0.0692   |
| REM EEG Power - Delta                 | -0.1684      | 0.1617               | 0.402119385 | 0.098    |
| Average Bout Length in 24h (s) - REM  | -18.72       | 0.1304               | 0.361109402 | 0.1409   |
| Total amount in 24h (s) - REM         | -3322        | 0.1237               | 0.351710108 | 0.1523   |
| REM EEG Power - Theta                 | -0.1272      | 0.1178               | 0.343220046 | 0.1632   |
| Wake EEG Power - Alpha                | -0.1065      | 0.03844              | 0.196061215 | 0.4356   |
| <b>Correlated</b>                     |              |                      |             |          |
| <b>Sleep parameters (Y)</b>           | <b>Slope</b> | <b>R<sup>2</sup></b> | <b>R</b>    | <b>P</b> |
| NREM EEG Power - Spindle              | 0.1483       | 0.3278               | 0.572538208 | 0.013*   |
| NREM EEG Power - Beta                 | 0.197        | 0.3066               | 0.553714728 | 0.0171*  |
| NREM EEG Power - Alpha                | 0.1861       | 0.2934               | 0.541664103 | 0.0202*  |
| Total amount in 24h (s) - Wake        | 31834        | 0.2342               | 0.483942145 | 0.0419*  |
| REM EEG Power - Beta                  | 0.1857       | 0.2096               | 0.457820926 | 0.0561   |
| NREM EEG Power - Theta                | 0.05046      | 0.1726               | 0.415451562 | 0.0864   |
| DA transient score - NREM             | 0.07452      | 0.2172               | 0.466047208 | 0.1267   |
| Average Bout Length in 24h (s) - Wake | 134.7        | 0.114                | 0.33763886  | 0.1706   |
| REM EEG Power - Alpha                 | 0.1098       | 0.09507              | 0.308334234 | 0.2132   |
| DA transient score - All states       | 0.04577      | 0.1453               | 0.381182371 | 0.2214   |
| DA transient score - REM              | 0.1725       | 0.1077               | 0.328176782 | 0.2977   |
| DA transient score - Wake             | 0.01928      | 0.05542              | 0.235414528 | 0.4614   |
| Wake EEG Power - Delta                | 0.07462      | 0.008301             | 0.091109824 | 0.7192   |
| Wake EEG Power - Beta                 | 0.02399      | 0.005303             | 0.0728217   | 0.774    |

| <b>Social Novelty (X)</b>             |              |                      |             |          |
|---------------------------------------|--------------|----------------------|-------------|----------|
| <b>Inverse correlated</b>             |              |                      |             |          |
| <b>Sleep parameters (Y)</b>           | <b>Slope</b> | <b>R<sup>2</sup></b> | <b>R</b>    | <b>P</b> |
| Total amount in 24h (s) - Wake        | -27930       | 0.4929               | 0.702068373 | 0.0012** |
| Average Bout Length in 24h (s) - Wake | -132.9       | 0.3032               | 0.550635996 | 0.0179*  |
| DA transient score - REM              | -0.4457      | 0.4442               | 0.666483308 | 0.0179*  |
| DA transient score - All states       | -0.08518     | 0.3111               | 0.557763391 | 0.0595   |
| REM EEG Power - Alpha                 | -0.08139     | 0.1957               | 0.442379927 | 0.066    |

|                                       |              |            |             |          |
|---------------------------------------|--------------|------------|-------------|----------|
| DA transient score - Wake             | -0.0523      | 0.2521     | 0.502095608 | 0.0963   |
| REM EEG Power - Delta                 | -0.09416     | 0.1421     | 0.376961536 | 0.1231   |
| NREM EEG Power - Theta                | -0.02765     | 0.1417     | 0.376430604 | 0.1236   |
| Wake EEG Power - Alpha                | -0.1135      | 0.1193     | 0.345398321 | 0.1604   |
| DA transient score - NREM             | -0.07321     | 0.1295     | 0.359861084 | 0.2505   |
| NREM EEG Power - Alpha                | -0.04923     | 0.05611    | 0.236875495 | 0.3439   |
| NREM EEG Power - Spindle              | -0.0148      | 0.008921   | 0.094451046 | 0.7093   |
| <b>Correlated</b>                     |              |            |             |          |
| <b>Sleep parameters (Y)</b>           | <b>Slope</b> | <b>R^2</b> | <b>R</b>    | <b>P</b> |
| Total amount in 24h (s) - NREM        | 25297        | 0.4943     | 0.70306472  | 0.0011** |
| Wake EEG Power - Theta                | 0.09947      | 0.4676     | 0.68381284  | 0.0018** |
| REM EEG Power - Theta                 | 0.1047       | 0.2993     | 0.547083175 | 0.0188*  |
| Total amount in 24h (s) - REM         | 2632         | 0.2124     | 0.460868745 | 0.0542   |
| Average Bout Length in 24h (s) - NREM | 18.34        | 0.1192     | 0.34525353  | 0.1605   |
| REM EEG Power - Beta                  | 0.07086      | 0.09024    | 0.300399734 | 0.2258   |
| Average Bout Length in 24h (s) - REM  | 4.173        | 0.01772    | 0.13311649  | 0.5985   |
| Wake EEG Power - Beta                 | 0.02466      | 0.01532    | 0.123773988 | 0.6247   |
| NREM EEG Power - Delta                | 0.05546      | 0.0144     | 0.12        | 0.6353   |
| NREM EEG Power - Beta                 | 0.02141      | 0.009904   | 0.099518842 | 0.6944   |

**Supplementary Table 2. Comparison of mouse models examined in this study.**

| Model                          | Shank3 R1117X                                                                                                                            | Neurologin-3 R451C                                                                                            | 16p11.2 deletion                                                                                                                              |
|--------------------------------|------------------------------------------------------------------------------------------------------------------------------------------|---------------------------------------------------------------------------------------------------------------|-----------------------------------------------------------------------------------------------------------------------------------------------|
| Mutation                       | Non-sense mutation in Shank3 exon 21 changing an arginine to stop codon (R1117X) (Zhou et al., 2016)                                     | Missense mutation in Neurologin-3 changing arginine to cysteine (R451C) (Jamain et al., 2003)                 | Deletion of the gene locus on chromosome 16, position 11.2 (16p11.2) (Rein and Yan, 2020)                                                     |
| Adolescent sleep architecture  | Reduced NREM and REM sleep; Decreased NREM-Delta and REM-Theta powers, increase of higher frequency powers in NREM and REM (this study). | No major defects (this study).                                                                                | No major defects (this study).                                                                                                                |
| Adult sleep architecture       | Similar defects as in adolescence (this study)                                                                                           | Generally normal sleep/wake pattern, slightly altered NREM power spectrum (Liu et al., 2017)                  | Reduced NREM and REM sleep, decreased REM/NREM ratio, REM fragmentation, altered REM power spectrum (Angelakos et al., 2017; Lu et al., 2019) |
| Other behavioral abnormalities | Increased anxiety level, defects in social interaction, allogrooming and dominance-like Behavior (Zhou et al., 2016)                     | Abnormal social interaction, stereotyped behavior, and enhanced spatial learning (Uchigashima et al., 2021)   | Hyperactivity (Angelakos et al., 2017)                                                                                                        |
| Synaptic defects               | Reduced synaptic transmission in striatum and prefrontal cortex (Zhou et al., 2016)                                                      | Altered synaptic transmission in hippocampus, cerebellum, and somatosensory cortex (Uchigashima et al., 2021) | Increased synaptic transmission in somatosensory cortex and nucleus accumbens, reduced transmission in prefrontal cortex (Rein and Yan, 2020) |

**References cited in this table:**

- Angelakos, C.C., Watson, A.J., O'Brien, W.T., Krainock, K.S., Nickl-Jockschat, T., and Abel, T. (2017). Hyperactivity and male-specific sleep deficits in the 16p11.2 deletion mouse model of autism. *Autism Res* 10, 572-584.
- Jamain, S., Quach, H., Betancur, C., Rastam, M., Colineaux, C., Gillberg, I.C., Soderstrom, H., Giros, B., Leboyer, M., Gillberg, C., *et al.* (2003). Mutations of the X-linked genes encoding neuroligins NLGN3 and NLGN4 are associated with autism. *Nat Genet* 34, 27-29.
- Liu, J.J., Grace, K.P., Horner, R.L., Cortez, M.A., Shao, Y., and Jia, Z. (2017). Neurologin 3 R451C mutation alters electroencephalography spectral activity in an animal model of autism spectrum disorders. *Mol Brain* 10, 10.
- Lu, H.C., Pollack, H., Lefante, J.J., Mills, A.A., and Tian, D. (2019). Altered sleep architecture, rapid eye movement sleep, and neural oscillation in a mouse model of human chromosome 16p11.2 microdeletion. *Sleep* 42.
- Rein, B., and Yan, Z. (2020). 16p11.2 Copy Number Variations and Neurodevelopmental Disorders. *Trends Neurosci* 43, 886-901.
- Uchigashima, M., Cheung, A., and Futai, K. (2021). Neurologin-3: A Circuit-Specific Synapse Organizer That Shapes Normal Function and Autism Spectrum Disorder-Associated Dysfunction. *Front Mol Neurosci* 14, 749164.
- Zhou, Y., Kaiser, T., Monteiro, P., Zhang, X., Van der Goes, M.S., Wang, D., Barak, B., Zeng, M., Li, C., Lu, C., *et al.* (2016). Mice with Shank3 Mutations Associated with ASD and Schizophrenia Display Both Shared and Distinct Defects. *Neuron* 89, 147-162.
